# Supplementary material for: The Effect of an Interprofessional Delivery Program on the Quality of Safe Care of Nurses in the Field of Patient Handoff to the Intensive Ward in the Selected Hospital in 2023: a quasi-experimental study
Source: Research Square preprint supplement (doi:10.21203/rs.3.rs-6001655/v1), 2025-02-27
Supplement: Supplementary file 1 [file 904400e6320701d6c97b2782.docx]

**Physiological examination of the patient**

| First and last name age gender name of department date of admission Blood type height weight reason for hospitalization current diagnosis Room number doctor's name | | |
| --- | --- | --- |
| 1) Patient safety: Bedside protection is high□ Nurse call availability□ Observance of hand hygiene□ Food/drug allergy, mention its type□ | 2) Determining the level of care: Level 1□ Level 2□ Level 3□ Level 4□ Level 5□ | 3) Severity of the patient's condition: Stable□ unstable□ watcher□ |
| 4) Vital signs: Pulse respiration rate  blood pressure  temperature | 5) Pain assessment:  Pain intensity 0-10  location of pain  Pain control drugs | 6) Movement status of the patient: RBR □ CBR □ PBR □ OOB □ |
| 7) Neurological examination: Level of Glasgow Coma Scale GCS Mental status of conscious patient □ coma□delirium □ confused□ The condition of the pupils is relative, meiosis, mydriasis, the condition of the reflexes is relative, non-relative  Use of limiter Yes No Muscle strength: 5.5 4.5 3.5 and below | 8) Examination of the cardiovascular system: Having CV Line □ □ PICC Line Swan Ganz □ Pacemaker □ AICD □ Angioket□ Connection date and location EF% capillary filling time Drip other drugs Abnormal cardiac rhythm SB □ NSR □ SR□ A Fib □ A Flutter □ PACs □ PVCs □ | 9) Examination of the respiratory system: Cough □ Ral □ Dyspnea □ Wizzing □ Ronkai □ Simple mask oxygen intake model□ Nasal cannula □ Venturi mask □ Mask with rebreathing of exhaled air □ Mask without rebreathing of exhaled air □ t-piece □ Tracheostomy □ Spo2 level Ventilator and its settings Mode Fio2 TV p P.S Having a chest tube and the amount of secretions |
| 10) Skin examination: smooth skin color skin temperature Wound and its location Dressing and its location and the amount of secretions Is the dressing bloody? Yes□ No□ | 11) Examination of the digestive system: normal, flat diet Renal □ NPO□ TPN□ NGT□ Ostomy□ Nausea□ Vomiting□ Diarrhea□ | 12) Examination of the urinary system: Anuria□ Incontinence□ Oliguri □ Desuri□ Diarrhea □ Constipation□ Using Bed pan □ Sund Foley and its history Dialysis□ Shaldon□ I/O |
| 13) Patient fall risk assessment (Morse): high risk and high risk (score 51 and above)□ Medium risk and moderate risk (25-50)□ Low risk and low risk (0-24)□ | 14) Bed ulcer risk assessment (Braden): very high risk (6-9)□ High risk (10-12)□ Medium risk (13-14)□ No risk (19-23)□ | 15) having the risk of developing thromboembolism: yes □ no □ Taking prophylaxis Antiembolic pump □ Heparin □ Coumadin □ Enoxaparin □ Rivaroxaban □ SCDs □ |
| 16) Having a drain: Drain type, drain location The amount of output in cc | 17) Presence of edema in organs: Yes□ No□ Mention the place and its degree | 18) Habits: Smoking□ Alcohol□ Drugs□ Other□ |

| 19) Volume and type of fluids received and its date: volume and type of serum Volume and type of blood product Microset Infusion pump | 20) Diagnostic measures performed and required: □ Echo □ MRI Cath□ Xray□ EGD □ EKG□ CT□ US □ stress□ | 21) Precautions: Aspiration □ Chemotherapy□ Convulsion □ Contact precautions□ Infectious □ isolated□ |
| --- | --- | --- |
| 22) Patient's medical history: Anxiety□ Depression□ □MI CAD□ □ COPD □ DM OSA □ □RDS □ PVD CHF Seizure □ □ CVA □ CKD□ □ PAD TIA □ □Liver disease □arthritis □HTN VRE □ □ MRSA TB □ | 23) Performed experiments: WBC K CKMB Hb INR TROP Na Cr BUN LFTs PH PLT PT PTT RBC U/A U/C | 24) Consultation (reference): Heart □ Neurology□ Anesthesia □ psyche □ Wound surgery Kidney □ Pulmonary □ Orthopedics□ Gastroenterology□ Eyes and ears □ |
| 25) Medicines consumed and received: | 26) Discharge: home □ nursing home □ other health care centers □ | 27) The last medicine received in the previous section: |

| Duties of the delivery nurse |
| --- |
| (1) The delivering nurse checks the doctor's order based on the transfer of the patient and enters the doctor's orders into the Cardex. |
| (2) In order to transfer the patient, the necessary coordination with the destination department and the presentation of the patient is done by phone. |
| (3) The nurse in charge of the patient should inform the patient and his family about the reason for the transfer, the destination department, the time of the transfer, etc |
| (4) The transferring nurse, the time of arrival, transfer date, transfer method, the name of the transferring nurse or patient, and the patient's conditions and place of transfer. Record the report. |
| (5) The nurse delivering the documents will check the patient's file. |
| (6 nurses in charge of patient transfer with safety principles and the use of necessary equipment, including beds, stretchers, wheelchairs, walkers and sufficient human resources, getting help from other personnel present in the nursing shift, midwives, Help Behar, transfer the staff of patient services. |
| (7) check the resuscitation equipment for the transfer of the patient with acute conditions. |
| (8) Check for a safe means of transportation. |
| (9) In case of need, is there an oxygen capsule with enough storage to reach the destination? |
| (10) Check the patient's identification bracelet, if the patient is alert, ask the patient's name and family name. |
| (11) The nurse records all the actions with the time and date in the nurse's report. |
| (12) Completing the patient's physiological examination form. |
| (13) In case of not performing the action, inform the reason for it to the person receiving the transfer. |
| (14) During the clinical transfer, important issues should be reported to the transferee and his/her supervisor (urgent and non-urgent reportable diseases, need for referral, consultation outside the hospital, involvement, etc.). |

| Nurses aid duties |
| --- |
| (1) Identification of the patient who has a transfer order. |
| (2) Take care of hand hygiene. |
| (3) The level of alertness and awareness of the patient should be measured. |
| (4) Prevent the patient from falling and falling. |
| (5) Raise the side rails of the bed and ask the patient to hang his legs from the bed for 10 minutes and then get out of the bed until orthostatic hypotension It did not happen. |
| (6) If necessary, wear gloves. |
| (7) patient connections including serum, drain, angiect, chest tube, tracheostomy, scraper tube, chestlead, urinary catheter, cuff Pressurize, connect to the ventilator and collect and prepare the items that the patient should take with him to the ward. |
| (8) Checking the movement status of the patient. |
| (9) Helping the caregiver in moving and transferring (walking, transferring to a stretcher and a wheelchair) |

| Duties of the transferee nurse |
| --- |
| 1) The delivery nurse performs the identification of the patient according to the secure identification protocol (checking the authentication bracelet and asking the patient's name if he is conscious and matching it with the specifications listed on the patient's file). |
| 2) The delivery nurse introduces himself to the patient politely. |
| 3) The delivery nurse records the arrival time, transfer date, transfer method, the name of the delivery nurse and the recipient, and the patient's condition in his nursing report. |
| 4) Check the nursing reports of the department of origin, which are complete and comprehensive and can be followed up. |
| 5) The patient delivery nurse receives the patient according to safety and infection control standards. |
| 6) The delivery nurse transfers the patient to the bed specified by the shift manager. |
| 7) ) The receiving nurse checks the information of the patient's physiological examination form with the delivering nurse and asks him questions. |
| 8) During transfer, the delivery nurse puts the patient in the right position and checks the patient's connections. |
| 9) The delivery nurse ensures that all connections and catheters, catheters and tubes are fixed and functional and checks that the tubes and connections do not have any kinks or blockages. |
| 10) control of tearing or leaving the main connection. |
| 11) Check possible changes or complications (bleeding, changes in vital signs, alarms and monitor changes) that may occur. |
| 12) The nurse who receives the required trainings, including the nurse call bell, safety, infection control, hand hygiene, time and method of visits by the doctor, meeting time, physical space, diet, food distribution time, location of equipment for religious duties to the patient inform (say the color of the food waste bin and the color of the infectious bin). |
| 13) The delivery nurse should provide appropriate and hygienic clothes to the patient and pay attention to the neatness and cleanliness of the patient's clothes, sheets, pillowcases and the room and unit around the patient. |
| 14) The delivery nurse should communicate with the patient's companion. |
| 15) The nurse raises the patient's bedside. |
| 16) The nurse should record all actions with time and date in the nursing report. |
| 17) Execute urgent orders. |
| 18) the correct position of the client, stretching and raising the affected limb should be done. |
